1 **Does the ratio of  $\beta$ -1,4-glucosidase (BG) to**  
2  **$\beta$ -1,4-N-acetylglucosaminidase (NAG) indicate the relative resource**  
3 **allocation of soil microbes to C and N acquisition?**

4

5 Taiki Mori<sup>1,2\*</sup>, Ryota Aoyagi<sup>3</sup>, Kanehiro Kitayama<sup>4</sup>, and Jiangming Mo<sup>1\*</sup>

6 \*Corresponding authors

7

8 <sup>1</sup>Key Laboratory of Vegetation Restoration and Management of Degraded Ecosystems,  
9 South China Botanical Garden and Guangdong Provincial Key Laboratory of Applied  
10 Botany, Chinese Academy of Sciences, Guangzhou, 510650, China

11 <sup>2</sup> Kyushu Research Center, Forestry and Forest Products Research Institute, FFPRI,  
12 Kurokami 4-11-16, Kumamoto, 860-0862, Japan

13 <sup>3</sup> Forestry and Forest Products Research Institute, Matsunosato 1, Tsukuba, Ibaraki  
14 305-8687, Japan

15 <sup>4</sup>Graduate School of Agriculture, Kyoto University, Kitashirakawa Oiwake-cho  
16 606-8502, Sakyo-ku, Kyoto, Japan

17

18 **Corresponding authors**

19 Taiki Mori: [taikimori7@gmail.com](mailto:taikimori7@gmail.com)

20 Jiangming Mo: [mojm@scib.ac.cn](mailto:mojm@scib.ac.cn)

21

22 **Abstract**

23 The ratio of  $\beta$ -1,4-glucosidase (BG) to  $\beta$ -1,4-N-acetylglucosaminidase (NAG) activity  
24 (BG:NAG ratio) is often used as an indicator of the relative resource allocation of soil

25 microbes to C acquisition compared with N. An increasing number of recent studies  
26 have used this index to assess the nutrient status of microbes. However, the validity of  
27 this index for assessing the nutrient status of microbes is not well tested. In this study,  
28 we collected published data and tested that validity by investigating whether N  
29 fertilization elevated the BG:NAG ratio, assuming that microbes reduce their allocation  
30 to the N-acquiring enzyme (NAG) under N-enriched conditions. Of the data points,  
31 54% (82/151) did not support the hypothesis because those studies showed lower  
32 BG:NAG ratios in N-enriched soils than under ambient conditions, especially when the  
33 ambient BG:NAG ratio was higher than 2.0 (77%, 59/77). This suggests that the  
34 BG:NAG ratio does not always indicate the microbial status for C or N limitation.  
35 Rather, we hypothesized that the decomposition stage explained the variation in  
36 BG:NAG because N addition accelerates decomposition, and the BG:NAG ratio is  
37 lower at later stages of decomposition due to the dominance of NAG-targeting C (chitin  
38 or peptidoglycan). A negative correlation of BG:NAG ratio with polyphenol oxidase  
39 activity, which increases with decomposition, supported our hypothesis.

40

41 **Key words:**  $\beta$ -1,4-glucosidase (BG);  $\beta$ -1,4-N-acetylglucosaminidase (NAG);  
42 decomposition; enzymatic stoichiometry; meta-analysis; nitrogen fertilization

43

#### 44 **Introduction**

45 Prior authors have suggested that the relative resource allocation of soil microbes to  
46 acquire energy and nutrients can be expressed as the ratio of extracellular enzyme  
47 activity targeting carbon (C), nitrogen (N), and phosphorus (P) (Sinsabaugh *et al.*, 2008,  
48 2009; Waring *et al.*, 2014). The ratio of  $\beta$ -1,4-glucosidase (BG) to

49  $\beta$ -1,4-N-acetylglucosaminidase (NAG) (BG:NAG ratio) is often used as an indicator of  
50 the relative resource allocation of microbes to C acquisition compared with N  
51 acquisition (Turner & Wright, 2014; Waring *et al.*, 2014; Zhou *et al.*, 2017; Chen *et al.*,  
52 2018). Recently, increasing numbers of studies have used the BG:NAG ratio to assess  
53 nutrient limitation or the status of microbes, assuming that a lower BG:NAG ratio  
54 indicates N shortage/N limitation (hereafter, the ecoenzymatic stoichiometry hypothesis;  
55 (Sinsabaugh *et al.*, 2008; Waring *et al.*, 2014; Moorhead *et al.*, 2016; Chen *et al.*, 2018;  
56 Mori *et al.*, 2018a; Wang *et al.*, 2018)). Nevertheless, this hypothesis has not been tested  
57 sufficiently, and several studies examining it have reported inconsistent results (Mori *et*  
58 *al.*, 2018a; Rosinger *et al.*, 2019; Mori, 2020). The validity of the BG:NAG ratio as a  
59 measure of the nutrient status of microbes needs to be tested by synthesizing  
60 accumulated data.

61 The ecoenzymatic stoichiometry hypothesis can be tested in N fertilization  
62 experiments. If the BG:NAG ratio really indicates the nutrient status of microbes, N  
63 fertilization will elevate it because microbes can get N directly from the fertilizer and  
64 reduce the allocation to N-acquiring enzymes, *i.e.*, NAG. Furthermore, the response of  
65 the BG:NAG ratio to N fertilization would be smaller under N-rich conditions because  
66 the decrease in NAG activity would be smaller. Accordingly, the predicted distribution  
67 of data could be drawn as shown in Fig. 1. In the present study, we collected published  
68 papers reporting the impact of N fertilization on the activity of BG and NAG and  
69 compared the BG:NAG ratio in surface soils before and after N fertilization.

70 We also established an alternative hypothesis, which stems from a completely  
71 different mechanism: the BG:NAG ratio does not indicate the relative allocation of  
72 microbes to C and N, but the source of the C resources (substrate) for microbes (Mori,

73 2020). This hypothesis is plausible for the following two reasons: (i) enzyme activity  
74 varies depending on the relative substrate availability [several studies have reported that  
75 the addition of a substrate caused elevation of enzyme activity that targets the added  
76 substrate (Shackle *et al.*, 2000)], and (ii) both BG and NAG can be produced for  
77 acquiring C (Mori *et al.*, 2018a; Wang *et al.*, 2018; Mori, 2020). When cellulose (*i.e.*, a  
78 BG-targeting C compound) is the dominant C resource in soil, microbes utilize more  
79 cellulose than chitin and peptidoglycan (a NAG-targeting C compound), leading to  
80 higher BG activity and a higher BG:NAG ratio (Mori, 2020). By contrast, chitin and  
81 peptidoglycan-dominant conditions cause microbes to utilize more chitin and  
82 peptidoglycan than cellulose, resulting in higher NAG activity and a lower BG:NAG  
83 ratio (Mori, 2020). As decomposition progresses, the relative abundance of cellulose  
84 decreases, whereas chitin and peptidoglycan becomes more abundant because chitin and  
85 peptidoglycan derived from microbial death is supplied to the soil via microbial  
86 turnover (see Fig. 2). As a result, NAG becomes a more dominant C-acquiring enzyme  
87 than BG. Therefore, our alternative hypothesis predicts that the BG:NAG ratio is lower  
88 when abundant soil organic matter is progressively decomposed (Fig. 2). According to  
89 this hypothesis, N fertilization can reduce the BG:NAG ratio, in contrast to the  
90 enzymatic stoichiometry hypothesis, because N enrichment is expected to stimulate  
91 organic matter decomposition under N-poor conditions (Hobbie, 2005). Furthermore,  
92 the hypothesis predicts that the BG:NAG ratio will be negatively correlated with the  
93 activity of polyphenol oxidase (PPO), a well-measured ecoenzyme that oxidizes lignin  
94 or humus and increases as decomposition progresses (Moorhead & Sinsabaugh, 2006;  
95 Sinsabaugh & Shah, 2011). To validate the prediction, data on PPO activity were also

96 collected from the literature. As N fertilization often has negative effects on PPO, we  
97 analyzed the correlations using only N-unfertilized data.

98

## 99 **Material and Methods**

100 Jian *et al.* (2016) published a meta-analysis reporting the impact of N fertilization on  
101 ecoenzymes, which comprehensively collected data on the response of coenzyme  
102 activity, including BG and NAG, to N fertilization through 2015, so we used the  
103 reported data in our analysis. Then, we searched the Web of Science for papers  
104 published later than 2015 using the following combinations of key words: (NAG OR  
105 chitinase OR  $\beta$ -1,4-N-acetyl- $\beta$ -glucosaminidase OR “N-acetyl  $\beta$ -glucosaminidase” OR  
106 glucosaminidase) AND (BG OR  $\beta$  G OR  $\beta$ -1,4-glucosidase OR glucosidase) AND  
107 (“nitrogen add\*” OR “N add\*” OR “nitrogen elevat\*” OR “N elevat\*” OR “nitrogen  
108 fertiliz\*” OR “N fertiliz\*” OR “nitrogen appl\*” OR “N appl\*” OR “nitrogen enrich\*”  
109 OR “N enrich\*”) (time span 2015–2018). We collected 151 data points from 40 papers.  
110 The relationship between the BG:NAG ratio under ambient conditions and that under  
111 N-enriched (fertilized) conditions was examined. If the paper reported PPO activity, we  
112 also recorded that. Pearson’s test was used to test the correlations between enzyme  
113 activities and the BG:NAG ratio. All statistical analyses were performed using R ver.  
114 3.4.1 or 3.4.4 (R Core Team, 2018).

115

## 116 **Results and Discussion**

117 A large proportion of the synthesized data did not support the coenzymatic  
118 stoichiometry hypothesis, although the distribution of the data was close to the predicted  
119 pattern (Fig. 1) when the ambient BG:NAG ratio was low (Fig. 3b). Of 151 data points,

120 82 (54%) indicated lower BG:NAG ratios in N-enriched soils than under ambient  
121 conditions (*i.e.*, the data points are below the solid line in Fig. 3), especially when the  
122 ambient BG:NAG ratio was higher than 2.0 (77%, 59/77). According to the chi-square  
123 test, a higher positive response ratio occurred when the ambient BG:NAG ratio was  
124  $< 2.0$  ( $P < 0.001$ ). The ecoenzymatic stoichiometry hypothesis cannot explain the  
125 lowered BG:NAG ratio in N-fertilized soils because, according to that hypothesis, the  
126 result indicates that N fertilization enhances the N shortage, which is contradictory. Our  
127 meta-analysis suggested that the BG:NAG ratio does not always indicate the nutrient  
128 status of soil microbes.

129         Other studies have also reported results inconsistent with the ecoenzymatic  
130 stoichiometry hypothesis (also see a perspective by Mori, 2020). Waring *et al.* (2014)  
131 collected 17 studies of N-rich tropical ecosystems and found that the mean BG:NAG  
132 ratio in these sites was not significantly different from the global average. In a lowland  
133 tropical rainforest in Bornean Malaysia, Mori *et al.* (2018a) reported that the BG:NAG  
134 ratio was similar to (or even slightly smaller than) the global average, although the  
135 forest is considered N rich (Aoyagi & Kitayama, 2016). This could be explained by the  
136 following hypothetical mechanism: under N-rich conditions, microbes produce  
137 NAG-targeting C because chitin and peptidoglycan, whose terminal reaction is  
138 catalyzed by NAG (Waring *et al.*, 2014), contains both C and N (Mori *et al.*, 2018a,  
139 2018b; Wang *et al.*, 2018). Several papers have supported our idea, reporting high NAG  
140 activity with a lack of a response of the NAG activity or BG:NAG ratio to N  
141 fertilization (see the meta-analysis by Jian *et al.* 2016).

142         Our alternative hypothesis was supported by the collected data. As predicted by  
143 the hypothesis, PPO activity was negatively correlated with the ambient BG:NAG ratio

144 in our dataset (Fig. 4). The result supports the idea that the BG:NAG ratio shows the  
145 decomposition stage. That is, as decomposition progresses, the BG:NAG ratio decreases  
146 because the abundance of chitin and peptidoglycan becomes dominant relative to that of  
147 cellulose (Fig. 2). Our alternative hypothesis can explain how N fertilization decreases  
148 the BG:NAG ratio and why lower BG:NAG ratios were mainly observed when the  
149 ambient BG:NAG ratios were  $>2.0$  (Fig. 3). At a relatively early stage of the  
150 decomposition process, where the cellulose content is relatively large and dominates the  
151 microbial C resources (higher BG:NAG ratio), N fertilization can accelerate  
152 decomposition and microbial activity (Yoshitake *et al.*, 2007). In such a case, the added  
153 N can change the C source of microbes to more microbial dead body-derived C (chitin  
154 and peptidoglycan dominant, NAG-targeting C), resulting in a lower BG:NAG ratio  
155 under N-added conditions. Conversely, at a later stage of decomposition, N addition  
156 generally suppresses organic matter decomposition (Fog, 1988; Knorr *et al.*, 2005;  
157 Janssens *et al.*, 2010), and a lower BG:NAG ratio caused by N fertilization should be  
158 observed less often (Fig. 3).

159 Although some of our data did not support the ecoenzymatic stoichiometry  
160 hypothesis, we cannot completely reject the hypothesis. When the ambient BG:NAG  
161 ratios are  $<2.0$ , the distribution of the data was close to the pattern predicted by that  
162 hypothesis (Fig. 1), and 69% (51/74) of the data points showed higher BG:NAG ratios  
163 in N-fertilized soils than under ambient conditions (Fig. 3). It is possible that the  
164 ecoenzymatic stoichiometry hypothesis is true when the NAG activity is relatively high,  
165 whereas another mechanism (such as our alternative hypothesis) controls the BG:NAG  
166 ratio in ecosystems with high BG:NAG ratios. The meta-analysis approach is unable to  
167 test this idea. We need other approaches, such as a laboratory experiment monitoring

168 the BG:NAG ratio of organic matter over the course of decomposition under both  
169 manipulated N-shortage and N-rich conditions.

170 In summary, we demonstrated that the BG:NAG ratio may not always indicate  
171 the nutrient status of microbes, as previously suggested (Rosinger *et al.*, 2019; Mori,  
172 2020), at least when the initial BG:NAG ratio exceeds 2.0. Our dataset also indicated  
173 that the stage of decomposition can explain variation in BG:NAG.

174

#### 175 **Acknowledgement**

176 This study was financially supported by a grant from environmental research aid, The  
177 Sumitomo Foundation 153082 and Grant-in-Aid for JSPS Postdoctoral Fellowships for  
178 Research Abroad (28·601) to T Mori.

179

180 **Statement of authorship:** TM conceived this study. TM and RA wrote the first draft of  
181 the manuscript. All of the authors contributed to the discussion and writing of the  
182 manuscript.

183

#### 184 **Conflict of interest**

185 We declare that we do not have any conflicts of interest.

186

#### 187 **References**

188 Aoyagi R. & Kitayama K. (2016). Nutrient allocation among plant organs across 13 tree  
189 species in three Bornean rain forests with contrasting nutrient availabilities.

190 *Journal of Plant Research*, 129(4), 1–10.

191 <https://doi.org/10.1007/s10265-016-0826-z>.



- 192 Chen H., Li D., Zhao J., Zhang W., Xiao K. & Wang K. (2018). Nitrogen addition  
193 aggravates microbial carbon limitation: Evidence from ecoenzymatic  
194 stoichiometry. *Geoderma*, 329(January), 61–64.  
195 <https://doi.org/10.1016/j.geoderma.2018.05.019>.
- 196 Fog K. (1988). The effect of added nitrogen on the rate of decomposition of organic  
197 matter. *Biological Reviews*, 63(3), 433–462.  
198 <https://doi.org/10.1111/j.1469-185X.1988.tb00725.x>.
- 199 Hobbie S. E. (2005). Contrasting effects of substrate and fertilizer nitrogen on the early  
200 stages of litter decomposition. *Ecosystems*, 8(6), 644–656.  
201 <https://doi.org/10.1007/s10021-003-0110-7>.
- 202 Janssens I., Dieleman W., Luyssaert S., Subke J., Reichstein M., Ceulemans R., ... Law  
203 B. (2010). Reduction of forest soil respiration in response to nitrogen deposition.  
204 *Nature Geoscience*, 3(5), 315–322. <https://doi.org/10.1038/ngeo844>.
- 205 Jian S., Li J., Chen J., Wang G., Mayes M. A., Dzantor K. E., ... Luo Y. (2016). Soil  
206 extracellular enzyme activities, soil carbon and nitrogen storage under nitrogen  
207 fertilization: A meta-analysis. *Soil Biology and Biochemistry*, 101, 32–43.  
208 <https://doi.org/10.1016/j.soilbio.2016.07.003>.
- 209 Knorr M., Frey S. & Curtis P. (2005). Nitrogen additions and litter decomposition: A  
210 meta analysis. *Ecology*, 86(12), 3252–3257. <https://doi.org/10.1890/05-0150>.
- 211 Moorhead D. L. & Sinsabaugh R. L. (2006). A theoretical model of litter decay and  
212 microbial interaction. *Ecological Monographs*, 76(2), 151–174.
- 213 Moorhead D. L., Sinsabaugh R. L., Hill B. H. & Weintraub M. N. (2016). Vector  
214 analysis of ecoenzyme activities reveal constraints on coupled C, N and P

- 215 dynamics. *Soil Biology and Biochemistry*, 93, 1–7.
- 216 <https://doi.org/10.1016/j.soilbio.2015.10.019>.
- 217 Mori T. (2020). Does ecoenzymatic stoichiometry really determine microbial nutrient
- 218 limitations? *Soil Biology and Biochemistry*, 146(April), 107816.
- 219 <https://doi.org/10.1016/j.soilbio.2020.107816>.
- 220 Mori T., Imai N., Yokoyama D. & Kitayama K. (2018a). Soil Science and Plant
- 221 Nutrition Effects of nitrogen and phosphorus fertilization on the ratio of activities
- 222 of carbon-acquiring to nitrogen-acquiring enzymes in a primary lowland tropical
- 223 rainforest in Borneo , Malaysia. *Soil Science and Plant Nutrition*, 00(00), 1–4.
- 224 <https://doi.org/10.1080/00380768.2018.1498286>.
- 225 Mori T., Lu X., Aoyagi R. & Mo J. (2018b). Reconsidering the phosphorus limitation of
- 226 soil microbial activity in tropical forests. *Functional Ecology*, 32(December 2017),
- 227 1145–1154. <https://doi.org/10.1111/1365-2435.13043>.
- 228 R Core Team (2018). R: A language and environment for statistical computing. R
- 229 Foundation for Statistical Computing, Vienna, Austria. URL
- 230 <https://www.R-project.org/>. 2018.
- 231 Rosinger C., Rousk J. & Sandén H. (2019). Can enzymatic stoichiometry be used to
- 232 determine growth-limiting nutrients for microorganisms? - A critical assessment in
- 233 two subtropical soils. *Soil Biology and Biochemistry*.
- 234 <https://doi.org/10.1016/j.soilbio.2018.10.011>.
- 235 Shackle V. J., Freeman C. & Reynolds B. (2000). Carbon supply and the regulation of
- 236 enzyme activity in constructed wetlands. *Soil Biology and Biochemistry*, 32,
- 237 1935–1940.

- 238 Sinsabaugh R. L., Hill B. H. & Follstad Shah J. J. (2009). Ecoenzymatic stoichiometry  
239 of microbial organic nutrient acquisition in soil and sediment. *Nature*, *462*(7274),  
240 795–8. <https://doi.org/10.1038/nature08632>.
- 241 Sinsabaugh R. L. & Shah J. J. F. (2011). Ecoenzymatic stoichiometry of recalcitrant  
242 organic matter decomposition: The growth rate hypothesis in reverse.  
243 *Biogeochemistry*, *102*(1), 31–43. <https://doi.org/10.1007/s10533-010-9482-x>.
- 244 Sinsabaugh R. L., Lauber C. L., Weintraub M. N., Ahmed B., Allison S. D., Crenshaw  
245 C., ... Zeglin L. H. (2008). Stoichiometry of soil enzyme activity at global scale.  
246 *Ecology Letters*, *11*(11), 1252–1264.  
247 <https://doi.org/10.1111/j.1461-0248.2008.01245.x>.
- 248 Turner B. L. & Wright S. J. (2014). The response of microbial biomass and hydrolytic  
249 enzymes to a decade of nitrogen, phosphorus, and potassium addition in a lowland  
250 tropical rain forest. *Biogeochemistry*, *117*(1), 115–130.  
251 <https://doi.org/10.1007/s10533-013-9848-y>.
- 252 Wang C., Lu X., Mori T., Mao Q., Zhou K., Zhou G., ... Mo J. (2018). Responses of  
253 soil microbial community to continuous experimental nitrogen additions for 13  
254 years in a nitrogen-rich tropical forest. *Soil Biology and Biochemistry*, *121*.  
255 <https://doi.org/10.1016/j.soilbio.2018.03.009>.
- 256 Waring B. G., Weintraub S. R. & Sinsabaugh R. L. (2014). Ecoenzymatic stoichiometry  
257 of microbial nutrient acquisition in tropical soils. *Biogeochemistry*, *117*(1),  
258 101–113. <https://doi.org/10.1007/s10533-013-9849-x>.
- 259 Yoshitake S., Uchida M., Koizumi H. & Nakatsubo T. (2007). Carbon and nitrogen  
260 limitation of soil microbial respiration in a High Arctic successional glacier

261 foreland near Ny-Ålesund, Svalbard. *Polar Research*, 26(1), 22–30.

262 <https://doi.org/10.1111/j.1751-8369.2007.00001.x>.

263 Zhou Z., Wang C. & Jin Y. (2017). Stoichiometric responses of soil microflora to

264 nutrient additions for two temperate forest soils. *Biology and Fertility of Soils*, 53,

265 397–406. <https://doi.org/10.1007/s00374-017-1188-y>.

266

267

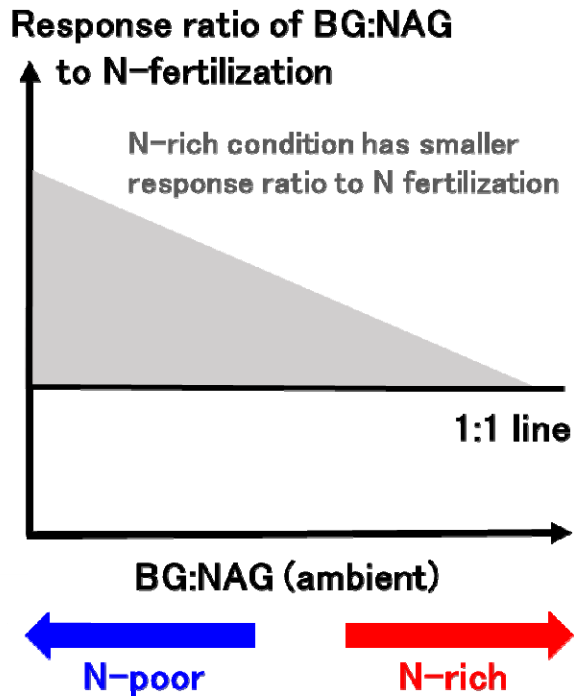

**Fig. 1.** The predicted relationship between the BG:NAG ratio under ambient conditions and the response ratio of the BG:NAG ratio to N fertilization according to the enzymatic stoichiometry hypothesis. Data points would be plotted above the 1:1 line because N fertilization does not lower the BG:NAG ratio. N-rich conditions (*i.e.*, a low BG:NAG ratio) showed a lower response ratio to N fertilization.

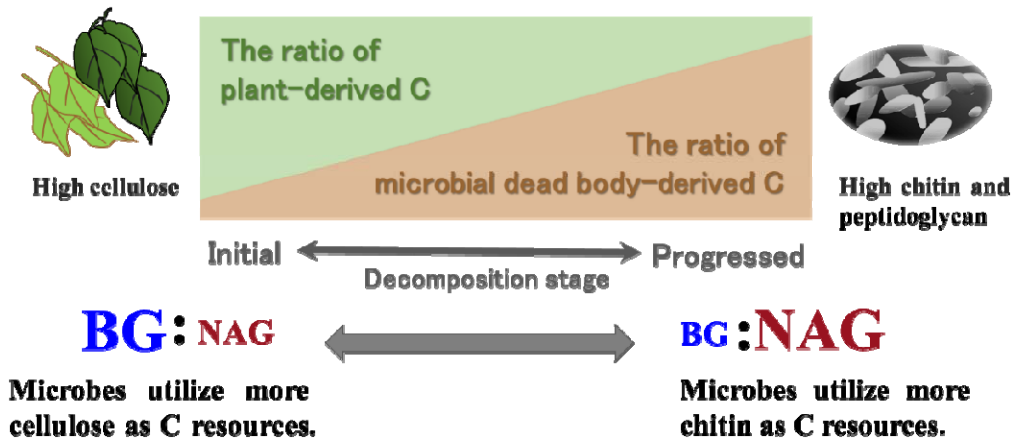

**Fig. 2.** Our new hypothesis explaining what the BG:NAG ratio shows. As microbial activity accelerates, the ratio of plant-derived C in the total C pool decreases, while the ratio of microbial dead body-derived C in the total C pool increases. As a result, NAG becomes the more dominant C-acquiring enzyme compared with BG, which leads to a decrease in the BG:NAG ratio.

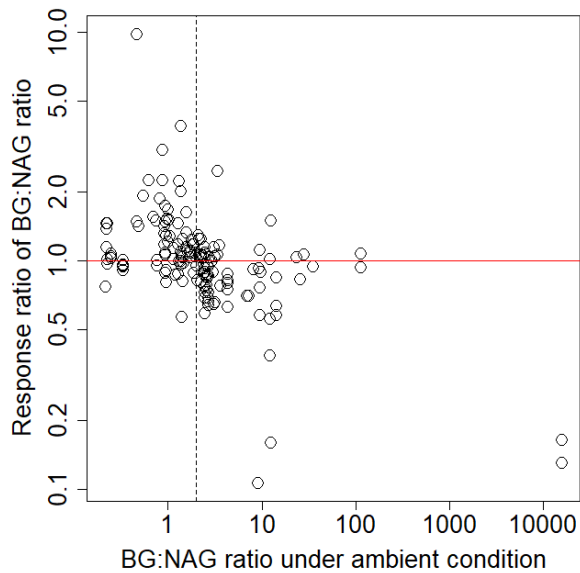

**Fig. 3.** The correlation between the BG:NAG ratio under ambient conditions with the response of the BG:NAG ratio to N fertilization. The solid red line is the 1:1 line. The dashed line represents the ambient condition under which the BG:NAG is 2.0. Of 151 data points, 82 (54%) showed lower BG:NAG ratios under ambient conditions. When the ambient BG:NAG ratio was higher than 2.0, 59 of 77 (77%) data points showed a lower BG:NAG ratio under ambient conditions.

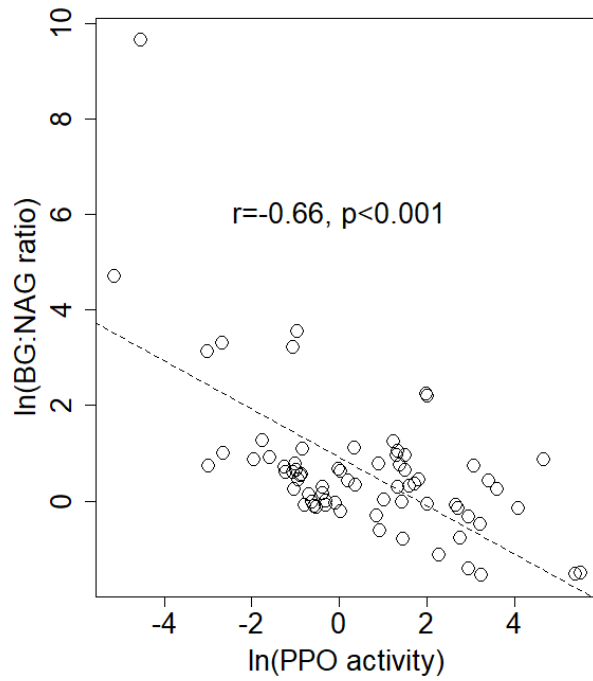

Source: https://biorxiv.org/content/10.1101/2021.02.08.430361v1.full.pdf
